# Supplementary material for: Evolution of pronounced ferroelectricity in Hf0.5Zr0.5O2thin films scaled down to 3 nm
Source: Royal Society of Chemistry journal article supplement (doi:10.1039/d1tc01778k), 2021-01-01
Supplement: d1tc01778k1.pdf [file d1tc01778k1.pdf]

# Supporting Information

## Evolution of pronounced ferroelectricity in $\text{Hf}_{0.5}\text{Zr}_{0.5}\text{O}_2$ thin films scaled down to 3 nm

Chin-I Wang<sup>a</sup>, Hsin-Yang Chen<sup>a</sup>, Chun-Yuan Wang<sup>a</sup>, Teng-Jan Chang<sup>a</sup>, Yu-Sen  
Jiang<sup>a</sup>, Chih-Sheng Chang<sup>b</sup>, and Miin-Jang Chen<sup>a\*</sup>

<sup>a</sup> Department of Materials Science and Engineering, National Taiwan University,  
Taipei, Taiwan, R.O.C.

<sup>b</sup> Taiwan Semiconductor Manufacturing Company, Hsinchu, Taiwan, R.O.C.

\* Authors to whom any correspondence should be addressed:

E-mail: [mjchen@ntu.edu.tw](mailto:mjchen@ntu.edu.tw)

Figure S1 shows the characteristics of the polarization and the current density versus the electric field of the MFM capacitors with the HZO thicknesses of ~10, 6, 4.8, 3.6, and 3 nm, respectively, in which the HZO layers were in the pristine state without experiencing any waking-up process. The hysteresis loops and the switching currents of the 10 nm and 6 nm HZO layers are similar to those shown in Figure 2 (measured after the waking-up process), which is consistent with the nearly wake-up free properties as revealed in Figure 12. Multiple peaks of the switching current and antiferroelectric-like hysteresis loops are observed as the thickness of the HZO layer is below 5 nm, suggesting that the t-phase or the pinched domains are present in the pristine HZO layer [1-3].

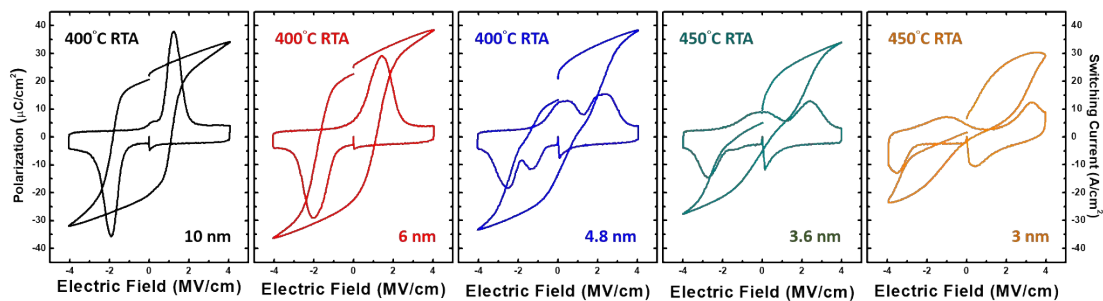

**Figure S1.** The  $P$ - $E$  hysteresis loops and the  $J$ - $E$  curves of the MFM capacitors with different HZO thicknesses from 10 to 3 nm, in which the HZO layers were in the pristine state without experiencing any waking-up process.

Reference:

- [1] P. D. Lomenzo *et al.*, "TaN interface properties and electric field cycling effects on ferroelectric Si-doped HfO<sub>2</sub> thin films," *Journal of Applied Physics*, vol. 117, no. 13, p. 134105, 2015.
- [2] M. Hoffmann *et al.*, "Stabilizing the ferroelectric phase in doped hafnium oxide," *Journal of Applied Physics*, vol. 118, no. 7, p. 072006, 2015.
- [3] T. Schenk *et al.*, "About the deformation of ferroelectric hystereses," *Applied Physics Reviews*, vol. 1, no. 4, p. 041103, 2014.
